# Supplementary material
Source: PubMed Central journal article supplement (PMC3546425)
Supplement: 1423-0127-19-49-S1.pdf [file 1423-0127-19-49-S1.pdf]

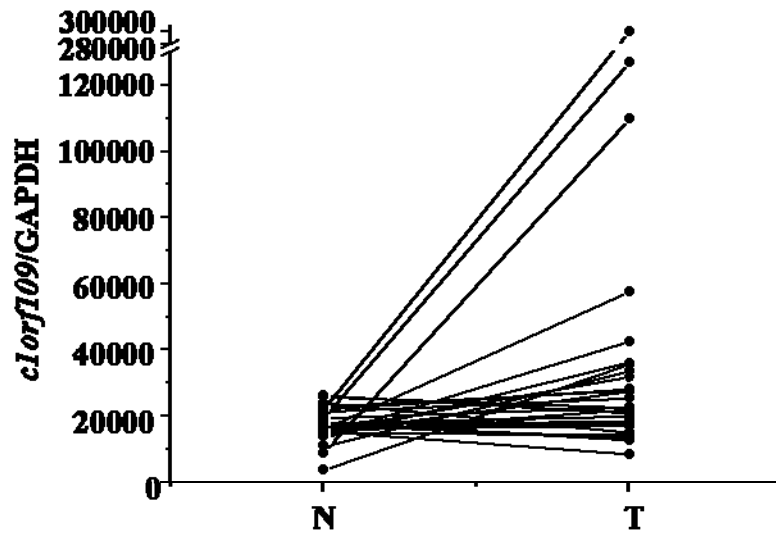

Hepatocellular carcinoma tissues were obtained from 27 patients who had undergone surgical resection at Affiliated Tumor Hospital, Harbin Medical University. After surgical resection, the tissues were frozen in liquid nitrogen. Total RNA were prepared from the 27 paired cases of human HCC tumors and adjacent nontumorous tissues. The expression of *c1orf109* was assessed by quantitative real-time PCR. The results showed that 11 of the 27 HCC patients (40.7%) manifested higher levels of C1ORF109 in the tumor tissues than nontumorous tissues ( $T/N > 1.5$ ).
